# Supplementary material
Source: MDPI journal article supplement (https://www.mdpi.com/2071-1050/8/4/335)
Supplement: s1 [file s1]

# Supplementary Materials: International and Domestic Sustainable Forest Management Policies: Distributive Effects on Power among State Agencies in Bangladesh

Lukas Giessen, Pradip Kumar Sarker and Md Saifur Rahman

**Table S1.** A list of policies and projects screened on sustainable forest management issues from 1992 to 2013.

| No. | Policy and Project on Sustainable Forest Management Issue in Bangladesh from 1992–2013                                         | Start Year | Funded by                                                                                                     |
|-----|--------------------------------------------------------------------------------------------------------------------------------|------------|---------------------------------------------------------------------------------------------------------------|
| 1   | National Environment Policy                                                                                                    | 1992       | Government of Bangladesh (GoB)                                                                                |
| 2   | Integrated Resource Development of the Sundarbans Reserved Forest, Bangladesh Project                                          | 1992       | Food and Agriculture Organization of the United Nations (FAO) and United Nations Development Programme (UNDP) |
| 3   | Forest Resources Management Project                                                                                            | 1992       | World Bank (WB)                                                                                               |
| 4   | Forestry Master Plan                                                                                                           | 1993       | Asian Development Bank (ADB) and UNDP                                                                         |
| 5   | Establishment of a Green belt along coastal areas through plantation of coconut, palm and forest species in Bangladesh Project | 1993       | ADB                                                                                                           |
| 6   | Development of Ramsagar Park and Recreation Facilities in the Area of Sal Forest Near Town of Dinajpur                         | 1993       | GoB                                                                                                           |
| 7   | National Forest Policy                                                                                                         | 1994       | GoB                                                                                                           |
| 8   | Advisory Technical Assistance on Regulatory Framework for Import of Hazardous and Toxic Materials in the Country Project       | 1994       | ADB                                                                                                           |
| 9   | Rehabilitation of Forest through Plantation in Rohingya Refugee Affected Area and Fuelwood Supply Project                      | 1994       | United Nations High Commissioner for Refugees (UNHCR)                                                         |
| 10  | Thana Afforestation and Nursery Development Project                                                                            | 1995       | ADB                                                                                                           |
| 11  | Expanded Social Afforestation Project                                                                                          | 1995       | GoB                                                                                                           |
| 12  | Afforestation and Settlement in the Unclassified State Forests of CHTs (2nd phase) Project                                     | 1995       | GoB                                                                                                           |
| 13  | Increasing Operational Efficiency in Forest Management of Forest Department Project                                            | 1995       | GoB                                                                                                           |
| 14  | National Environment Management Action Plan (NEMAP)                                                                            | 1995       | UNDP                                                                                                          |
| 15  | Coastal Green Belt Project                                                                                                     | 1995       | ADB and Norwegian Agency for Development Cooperation (NORAD)                                                  |
| 16  | Afforestation in the Unclassified State Forests, Reserve Forests and Private Owned Forests of CHTs Project                     | 1995       | GoB                                                                                                           |

Table S1. *Cont.*

| No. | Policy and Project on Sustainable Forest Management Issue in Bangladesh from 1992–2013                                                         | Start Year | Funded by                                                         |
|-----|------------------------------------------------------------------------------------------------------------------------------------------------|------------|-------------------------------------------------------------------|
| 17  | Departmental Extraction of Top Dying Sundri Trees from the Infected Areas and Enrichment Planting in the Gaps Created in the Sundarban Forests | 1995       | GoB                                                               |
| 18  | Forestry Sector Project                                                                                                                        | 1997       | ADB                                                               |
| 19  | Integrated Development of National Botanical Garden, Baldha Garden and National Herbarium project                                              | 1997       | GoB                                                               |
| 20  | Bangladesh Environmental Conservation Act and Rules                                                                                            | 1997       | GoB                                                               |
| 21  | Intensive Afforestation Project                                                                                                                | 1997       | GoB                                                               |
| 22  | Development of Facilities and Maintenance of Infrastructure of the Forest Department in the Hill Tract District                                | 1998       | GoB                                                               |
| 23  | Forest Nursery Development for Rehabilitation of Unemployed Freedom Fighters                                                                   | 1998       | GoB                                                               |
| 24  | Sustainable Environment Management Program (SEMP)                                                                                              | 1998       | UNDP                                                              |
| 25  | Establishment of Agar Garden                                                                                                                   | 1998       | GoB                                                               |
| 26  | Establishment of Park and Breeding Centre for Wildlife in the Dulhazra Forest Area, Cox's Bazar                                                | 1998       | GoB                                                               |
| 27  | Genetics Diversity and Propagation of Mangroves Project                                                                                        | 1998       | Australian Centre for International Agricultural Research (ACIAR) |
| 28  | Sundarban Biodiversity Conservation Project                                                                                                    | 1999       | ADB, Global Environmental Facility (GEF) and Govt. of Netherlands |
| 29  | Botanical Garden, Sitakundo Project                                                                                                            | 1999       | GoB                                                               |
| 30  | Char Afforestation Project in the Northern Region                                                                                              | 1999       | GoB                                                               |
| 31  | Establishment of Eco-park in the Barobkundo and Baroiadhala Waterfall Area Project                                                             | 1999       | GoB                                                               |
| 32  | Conservation of Biggest and Oldest Batbrikho (Bat Tree) Project                                                                                | 1999       | GoB                                                               |
| 33  | Rural Plantation Project                                                                                                                       | 2000       | GoB                                                               |
| 34  | Playground, Open Space, Garden and Natural Wetland Conservation Act                                                                            | 2000       | GoB                                                               |
| 35  | Coastal and Wetland Biodiversity Management (CWBMP) Project                                                                                    | 2000       | GoB and UNDP                                                      |
| 36  | Bangobondhu National Garden, Bhaowal                                                                                                           | 2000       | GoB                                                               |
| 37  | Afforestation in the Bare Hills of Ramgor and Sitakundo                                                                                        | 2000       | GoB                                                               |
| 38  | Kaptai National Garden Development Project                                                                                                     | 2000       | GoB                                                               |
| 39  | Study on Control and Management of Polythin Bags in Bangladesh                                                                                 | 2000       | GoB                                                               |

Table S1. *Cont.*

| No. | Policy and Project on Sustainable Forest Management Issue in Bangladesh from 1992–2013                                  | Start Year | Funded by                                                  |
|-----|-------------------------------------------------------------------------------------------------------------------------|------------|------------------------------------------------------------|
| 40  | Biodiversity Conservation, Establishment of Marine Park and Eco-Tourism Development Project                             | 2000       | GoB                                                        |
| 41  | Social Afforestation in the Area of Guide Badh of Bangabondhu Jamuna Multipurpose Bridge Project                        | 2000       | GoB                                                        |
| 42  | Establishment of Forest Management Unit under Forest Directorate Project                                                | 2001       | GoB                                                        |
| 43  | Afforestation of Bare Hills in the Greater Sylhet and Cox's Bazar District Project                                      | 2001       | GoB                                                        |
| 44  | Development of Botanical Garden in the Lalmai Hill Area Project                                                         | 2002       | GoB                                                        |
| 45  | A Study on Behavior and Ecology of the Tigers in the Sundarban Reserve Forest in Bangladesh                             | 2002       | United States Agency for International Development (USAID) |
| 46  | Bangladesh National Programme of Action for Protection of the Coastal and Marine Environment from Land-Based Activities | 2003       | United Nations Environment Programme (UNEP)                |
| 47  | Clean Development Mechanism (CDM) Policies and Strategies                                                               | 2003       | GoB                                                        |
| 48  | Social Forestry Rules                                                                                                   | 2004       | ADB                                                        |
| 49  | Nishorgo Support Project initiatives                                                                                    | 2004       | USAID                                                      |
| 50  | Community Based Sustainable Management of Tanguar Haor Ramsar Site project                                              | 2004       | Swiss Agency for Development and Cooperation (SDC)         |
| 51  | Char development and settlement project                                                                                 | 2005       | Netherlands                                                |
| 52  | National Action Program (NAP) for Combating Desertification                                                             | 2005       | IUCN                                                       |
| 53  | Rules of Prime Minister's National Award on Tree Plantation                                                             | 2005       | GoB                                                        |
| 54  | Bangobondhu Award for Wildlife Conservation Rules-                                                                      | 2005       | GoB                                                        |
| 55  | National Biodiversity Strategy and Action Plan for Bangladesh (NBSAP)                                                   | 2005       | GEF and UNDP                                               |
| 56  | Conservation of Biodiversity and Development of Natural Environment in the Greater Jessore District Project             | 2005       | GoB                                                        |
| 57  | Establishment of Botanical Garden and Eco-Park in Sitakundu, Chittagong project                                         | 2005       | GoB                                                        |
| 58  | Sundarbans Protected Area Management Assistance Project                                                                 | 2005       | GoB                                                        |
| 59  | Coastal Char Land Afforestation Project                                                                                 | 2005       | GoB                                                        |
| 60  | National Adaptation Program of Action (NAPA)                                                                            | 2005       | UNDP and GEF                                               |
| 61  | Afforestation Program for Natural Balance in the Barind Tract                                                           | 2006       | GoB                                                        |

Table S1. *Cont.*

| No. | Policy and Project on Sustainable Forest Management Issue in Bangladesh from 1992–2013                                      | Start Year | Funded by                                                                                                                            |
|-----|-----------------------------------------------------------------------------------------------------------------------------|------------|--------------------------------------------------------------------------------------------------------------------------------------|
| 62  | Strengthening Monitoring Assessment and Reporting on SFM in Asia                                                            | 2006       | FAO, Govt. of Japan                                                                                                                  |
| 63  | Encyclopedia of Flora and Fauna of Bangladesh Published                                                                     | 2007       | GoB                                                                                                                                  |
| 64  | Capacity development Action Plan for Sustainable Environmental Governance                                                   | 2007       | GEF and UNDP                                                                                                                         |
| 65  | Development of National Biosafety Framework (NBF)                                                                           | 2007       | UNEP and GEF                                                                                                                         |
| 66  | Capacity Building and Resource Mobilization for Sustainable Land Management Project                                         | 2007       | UNDP and GEF                                                                                                                         |
| 67  | Biosafety Guidelines of Bangladesh                                                                                          | 2007       | GoB                                                                                                                                  |
| 68  | Bangobondhu Sheikh Mujib Safari Park, Cox's Bazar Development Project                                                       | 2007       | GoB                                                                                                                                  |
| 69  | Establishment of Eco-Park in the Greater Sylhet District of Tilagor and Borshijora Project                                  | 2007       | GoB                                                                                                                                  |
| 70  | Establishment of Dhansiri Eco-Park and Development of Ramsagor National Garden Project                                      | 2007       | GoB                                                                                                                                  |
| 71  | Conservation and Development of Biodiversity in the Banshkhali Upazila of Chittagong and Chunati Wildlife Sanctuary Project | 2007       | GoB                                                                                                                                  |
| 72  | Establishment of Eco-Park in the Madhobkundo Cascade Area Project                                                           | 2007       | GoB                                                                                                                                  |
| 73  | Establishment of Agar Garden Project                                                                                        | 2007       | GoB                                                                                                                                  |
| 74  | Afforestation of Bare Hills in the North Forest Division, Chittagong                                                        | 2008       | GoB                                                                                                                                  |
| 75  | Conservation and Development of Biodiversity through Plantation in the Greater Rajshahi and Kushtia District                | 2008       | GoB                                                                                                                                  |
| 76  | Social Afforestation through People's Participation in the Hill Tracts Area Project                                         | 2008       | GoB                                                                                                                                  |
| 77  | Development and Dissemination of Forest Related Innovative Technology                                                       | 2008       | GoB                                                                                                                                  |
| 78  | Bamboo, Cane and Murta Plantation Project                                                                                   | 2009       | GoB                                                                                                                                  |
| 79  | Bangladesh Spotted-Deer Rearing Policy                                                                                      | 2009       | GoB                                                                                                                                  |
| 80  | Community Based Adaptation to Climate Change through Coastal Afforestation Project                                          | 2009       | GEF, UNDP, GoB                                                                                                                       |
| 81  | Bangladesh Tiger Action Plan 2009–2017                                                                                      | 2009       | United States Fish and Wildlife Service, Wildlife Trust of Bangladesh, Zoological Society of London, and the University of Minnesota |

Table S1. *Cont.*

| Policy and Project on Sustainable Forest Management Issue in Bangladesh from 1992–2013 |                                                                                                                                                                                      |            |                                                                                                                                          |
|----------------------------------------------------------------------------------------|--------------------------------------------------------------------------------------------------------------------------------------------------------------------------------------|------------|------------------------------------------------------------------------------------------------------------------------------------------|
| No.                                                                                    | Management Issue in Bangladesh from 1992–2013                                                                                                                                        | Start Year | Funded by                                                                                                                                |
| 82                                                                                     | Poverty, Environment and Climate Mainstreaming Project (PECM)                                                                                                                        | 2009       | UNDP                                                                                                                                     |
| 83                                                                                     | Clean Air and Sustainable Environment Project                                                                                                                                        | 2009       | WB                                                                                                                                       |
| 84                                                                                     | Bangladesh Climate Change Strategy and Action Plan (BCCSAP)                                                                                                                          | 2009       | GoB                                                                                                                                      |
| 85                                                                                     | National Conservation Strategy (NCS)                                                                                                                                                 | 2010       | International Union for the Conservation of Nature and Natural Resources (IUCN) and Norwegian Agency for Development Cooperation (NORAD) |
| 86                                                                                     | The Bangladesh Environment Conservation (Amendment) Act                                                                                                                              | 2010       | GoB                                                                                                                                      |
| 87                                                                                     | Biodiversity National Assessment and Programme of Action 2020                                                                                                                        | 2010       | UNDP and GEF                                                                                                                             |
| 88                                                                                     | Compensation Policy for Casualties Caused by Wildlife                                                                                                                                | 2010       | GoB                                                                                                                                      |
| 89                                                                                     | Environmental Court Act-2010                                                                                                                                                         | 2010       | GoB                                                                                                                                      |
| 90                                                                                     | Sand Yard and Soil Management Act                                                                                                                                                    | 2010       | GoB                                                                                                                                      |
| 91                                                                                     | Establishment of Sheikh Mujib Safari Park, Gajipur project                                                                                                                           | 2010       | GoB                                                                                                                                      |
| 92                                                                                     | Sheikh Rasel Aviary and Eco-Park at Rangunia, Chittagong                                                                                                                             | 2010       | GoB                                                                                                                                      |
| 93                                                                                     | Integrated Protected Area Co-Management (IPAC)                                                                                                                                       | 2010       | USAID                                                                                                                                    |
| 94                                                                                     | National report to the 9th session of the United Nations Forum on Forests                                                                                                            | 2010       | GoB                                                                                                                                      |
| 95                                                                                     | Poverty Reduction through Social Forestry Program                                                                                                                                    | 2010       | GoB                                                                                                                                      |
| 96                                                                                     | Sundarban Environmental And Livelihoods Security (SEALS) project                                                                                                                     | 2010       | European Union (EU)                                                                                                                      |
| 97                                                                                     | Bangladesh Climate Change Trust Fund (BCCTF)                                                                                                                                         | 2010       | GoB                                                                                                                                      |
| 98                                                                                     | Bangladesh Climate Change Resilience Fund (BCCRF)                                                                                                                                    | 2010       | WB, Denmark, EU, Australia, Sweden, Switzerland, UK, USA                                                                                 |
| 99                                                                                     | National report to the 10th session of the United Nations Forum on Forests                                                                                                           | 2011       | GoB                                                                                                                                      |
| 100                                                                                    | Restoration and Conservation of Biodiversity in the Denuded Hills of Sitakunda, Mirarsharai, Banskhali, Inani Forest area, Barined Damurhat Sal Forest and Singra Sal Forest Project | 2011       | USAID                                                                                                                                    |
| 101                                                                                    | Biodiversity Conservation and Eco-tourism Development in Bangladesh Project                                                                                                          | 2011       | GoB                                                                                                                                      |

Table S1. *Cont.*

| No. | Policy and Project on Sustainable Forest Management Issue in Bangladesh from 1992–2013                                                                                | Start Year | Funded by                                         |
|-----|-----------------------------------------------------------------------------------------------------------------------------------------------------------------------|------------|---------------------------------------------------|
| 102 | Sustainable Development and Biodiversity Conservation in Coastal Protection Forests                                                                                   | 2011       | German Agency for International Cooperation (GIZ) |
| 103 | Resource Conservation through Community Reforestation and Forest Management in Chunati Wildlife Sanctuary, Chittagong                                                 | 2011       | GIZ                                               |
| 104 | Strengthening Regional Cooperation for Wildlife Protection Project                                                                                                    | 2011       | WB                                                |
| 105 | Memorandum of Understanding between Bangladesh and India on “Conservation of the Sundarban” and Protocol on “Conservation of The Royal Bengal Tiger of the Sundarban” | 2011       | GoB                                               |
| 106 | Transit Rules of Forest Products and Timber                                                                                                                           | 2011       | GoB                                               |
| 107 | Sixth Five Year Plan                                                                                                                                                  | 2011       | GoB                                               |
| 108 | Bangladesh Bio-safety Rules-2012                                                                                                                                      | 2012       | GoB                                               |
| 109 | Bangladesh Wildlife (Preservation & Security), Act-2012                                                                                                               | 2012       | GoB                                               |
| 110 | Bangladesh Biological Diversity Act-2012                                                                                                                              | 2012       | GoB                                               |
| 111 | Saw-mill (License) Rules-2012                                                                                                                                         | 2012       | GoB                                               |
| 112 | Rio + 20, National Report on Sustainable Development                                                                                                                  | 2012       | UNDP                                              |
| 113 | Climate Resilient Participatory Afforestation and Reforestation Project                                                                                               | 2012       | WB, GoB, and Arannayk Foundation (AF)             |
| 114 | Perspective Plan of Bangladesh                                                                                                                                        | 2012       | GoB                                               |
| 115 | Bangladesh REDD+ Readiness Roadmap                                                                                                                                    | 2012       | UNDP and FAO                                      |
| 116 | National Sustainable Development Strategy 2010–2021                                                                                                                   | 2013       | UNEP                                              |
| 117 | Brick Burning (Control) (Amendment) Act                                                                                                                               | 2013       | GoB                                               |
| 118 | Updating and Mainstreaming of National Biodiversity Strategy and Action Plan (NBSAP) for Bangladesh Project                                                           | 2013       | GEF                                               |
| 119 | Bangladesh Brick Kiln Efficiency Project                                                                                                                              | 2013       | GEF                                               |
| 120 | Bangladesh: Revision and Alignment of National Action Program with UNCCD 10 Years Strategy Plan and Framework Project                                                 | 2013       | GEF                                               |
| 121 | National Bio-safety Plan of Action Project                                                                                                                            | 2013       | UNDP                                              |
